# Supplementary material for: Quinolizidine-Based Variations and Antifungal Activity of Eight Lupinus Species Grown under Greenhouse Conditions
Source: MDPI journal article supplement (doi:10.3390/molecules27010305), 2022-01-04
Supplement: s1 [file s1]

# Supplementary Material

## Quinolizidine-Based Variations and Antifungal Activity of Eight *Lupinus* Species Grown under Greenhouse Conditions

Willy Cely-Veloza, Diego Quiroga Daza, Ericsson Coy-Barrera

Bioorganic Chemistry Laboratory, Department of Chemistry, Universidad Militar Nueva Granada, Cajicá 250247, Colombia.

### Content

|                                                                                                         | Page |
|---------------------------------------------------------------------------------------------------------|------|
| <b>Table S1</b> Yields of QREs obtained from propagated <i>Lupinus</i> species under greenhouse         | 2    |
| <b>Table S2</b> Replicates of the mycelial growth inhibition percentages of each lupin-based treatment. | 2    |
| <b>Figure S1</b> Structures of QA identified in the eight species of <i>Lupinus</i>                     | 3    |
| <b>Figure S2</b> Antifungal activity against <i>F. oxysporum</i> of eight <i>Lupinus</i> species.       | 3    |
| <b>Equation S1</b> Retention index calculation                                                          | 4    |

**Table S1.** Yields of QREs obtained from propagated *Lupinus* species under greenhouse.

| Plant                      | fresh leaves (g)             | QRE (g)                      | Yield (%)                  |
|----------------------------|------------------------------|------------------------------|----------------------------|
| <i>Lupinus polyphyllus</i> | 5.1922 ± 0.3531 <sup>A</sup> | 0.2371 ± 0.0166 <sup>B</sup> | 4.566 ± 0.230 <sup>B</sup> |
| <i>Lupinus perennis</i>    | 5.1681 ± 0.2481 <sup>A</sup> | 0.2352 ± 0.0157 <sup>B</sup> | 4.551 ± 0.523 <sup>B</sup> |
| <i>Lupinus bogotensis</i>  | 5.1095 ± 0.3168 <sup>A</sup> | 0.2834 ± 0.0192 <sup>A</sup> | 5.547 ± 0.320 <sup>A</sup> |
| <i>Lupinus mutabilis</i>   | 5.0144 ± 0.3109 <sup>A</sup> | 0.2753 ± 0.0146 <sup>A</sup> | 5.490 ± 0.331 <sup>A</sup> |
| <i>Lupinus mirabilis</i>   | 5.0513 ± 0.3031 <sup>A</sup> | 0.3052 ± 0.0122 <sup>A</sup> | 6.042 ± 0.204 <sup>A</sup> |
| <i>Lupinus argenteus</i>   | 4.9245 ± 0.3250 <sup>A</sup> | 0.1235 ± 0.0060 <sup>C</sup> | 2.508 ± 0.188 <sup>C</sup> |
| <i>Lupinus arboreus</i>    | 5.0223 ± 0.2310 <sup>A</sup> | 0.1392 ± 0.0067 <sup>C</sup> | 2.772 ± 0.160 <sup>C</sup> |
| <i>Lupinus albus</i>       | 5.0764 ± 0.3401 <sup>A</sup> | 0.2186 ± 0.0096 <sup>B</sup> | 4.306 ± 0.277 <sup>B</sup> |

Values expressed as means ± standard deviation (n = 10). Different uppercase capital letters indicate statistically significant differences according to the post hoc Tukey test ( $p < 0.05$ ).

**Table S2.** Replicates of the mycelial growth inhibition percentages of each lupin-based treatment.

| Species    | 5.0 µg/µL |      |      |      | 1.0 µg/µL |      |    |      | 0.1 µg/µL |      |      |     |
|------------|-----------|------|------|------|-----------|------|----|------|-----------|------|------|-----|
|            | SD        |      |      |      | SD        |      |    |      | SD        |      |      |     |
| <b>Lb</b>  | 92.8      | 90.2 | 89.1 | 1.90 | 80.0      | 80.2 | 80 | 0.36 | 68.1      | 70.2 | 74.2 | 3.1 |
| <b>Lmu</b> | 80.2      | 83.6 | 82.4 | 1.72 | 58.9      | 60.3 | 62 | 1.60 | 49.0      | 53.2 | 50.8 | 2.1 |
| <b>Lmi</b> | 92.0      | 88.4 | 90.6 | 1.81 | 86.0      | 80.4 | 84 | 2.80 | 72.5      | 70.6 | 70.1 | 1.3 |
| <b>Lar</b> | 60.3      | 65.4 | 70.1 | 4.90 | 39.9      | 44.2 | 44 | 2.39 | 24.4      | 27.4 | 28.7 | 2.2 |
| <b>Lab</b> | 57.6      | 60.3 | 58.4 | 1.38 | 45.0      | 40.3 | 42 | 2.39 | 37.9      | 40.5 | 36.8 | 1.9 |
| <b>Lal</b> | 50.7      | 52.9 | 53.6 | 1.49 | 38.4      | 40.3 | 40 | 0.95 | 25.8      | 27.5 | 26.2 | 0.9 |
| <b>Lpe</b> | 67.7      | 70.2 | 69.4 | 1.29 | 56.1      | 57.3 | 51 | 3.40 | 34.1      | 31.6 | 36.9 | 2.7 |
| <b>Lpo</b> | 94.6      | 92.1 | 93.5 | 1.26 | 93.5      | 90.2 | 95 | 2.63 | 86.9      | 83.1 | 86.3 | 2.0 |
| <b>M47</b> | 97.1      | 95.6 | 94.9 | 1.12 | 93.0      | 95.6 | 95 | 1.31 | 90.0      | 94.6 | 91.8 | 2.3 |
| <b>R</b>   | 98.3      | 97.9 | 98.1 | 0.20 | 95.0      | 96.5 | 97 | 1.12 | 94.0      | 95.9 | 97.1 | 1.6 |

**R** = roval, **M47** = dithane, **Lpo** = *L. polyphyllus*, **Lb** = *L. bogotensis*, **Lmi** = *L. mirabilis*, **Lmu** = *L. mutabilis*, **Lpe** = *L. perennis*, **Lab** = *L. arboreus*, **Lal** = *L. albus*, **Lar** = *L. argenteus*, **SD** = Standard deviation

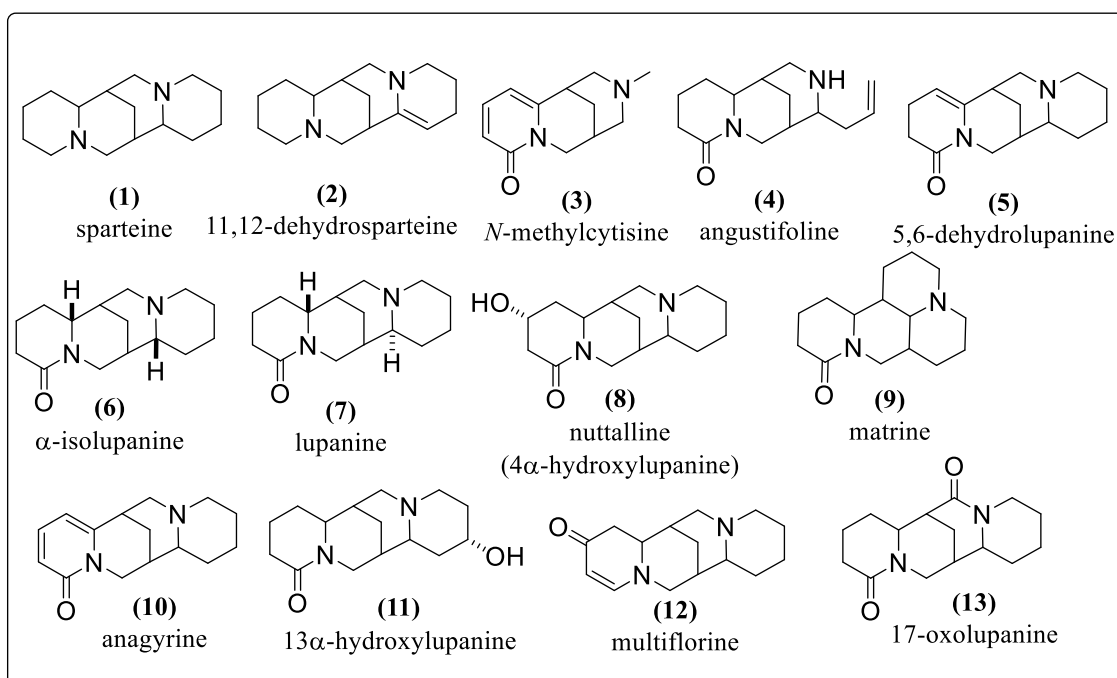

**Figure S1.** Structures of QA identified in the eight species of *Lupinus*

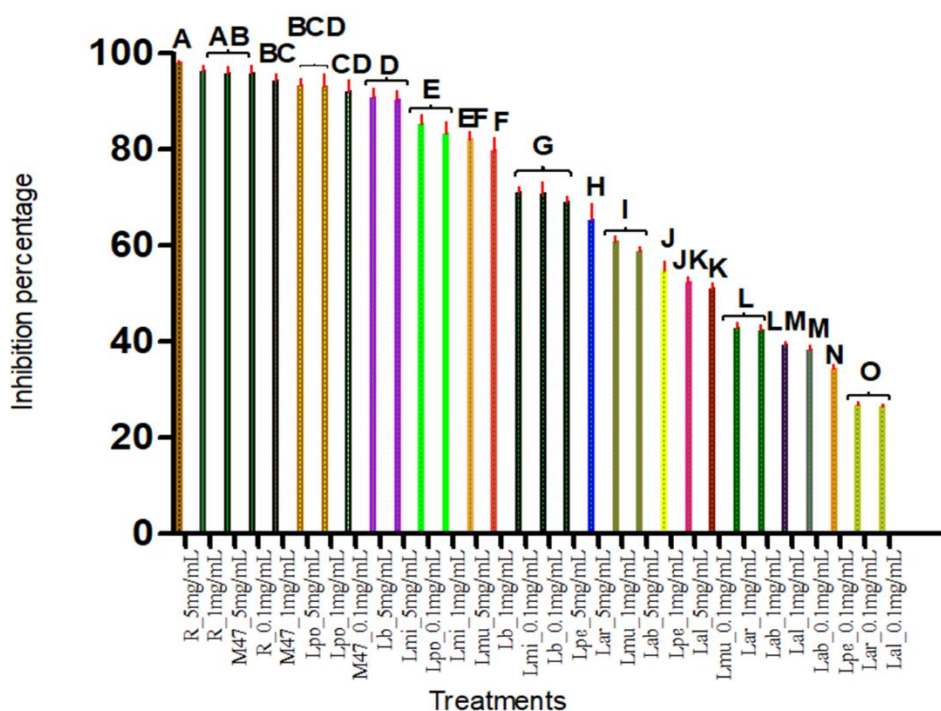

**Figure S2.** Antifungal activity against *F. oxysporum* of eight *Lupinus* species. Significantly different groups obtained by Tukey's statistical test. (**R** = rovril, **M47** = dithane, **Lpo** = *L. polyphyllus*, **Lb** = *L. bogotensis*, **Lmi** = *L. mirabilis*, **Lmu** = *L. mutabilis*, **Lpe** = *L. perennis*, **Lab** = *L. arboreus*, **Lal** = *L. albus*, **Lar** = *L. argenteus*). Different letters indicated statistically different groups ( $p > 0.05$ ).

**Equation S1.** Retention Index (RI) calculation:

$$RI = 100n + 100 [\log(t'_x) - \log(t'_n)] / [\log(t'_{n+1}) - \log(t'_n)]$$

where  $t'_n$  and  $t'_{n+1}$  are the adjusted retention times of the reference  $n$ -alkane hydrocarbons (C<sub>10</sub>-C<sub>24</sub>) that are eluted immediately before and after compound “X” and  $t'_x$  is the adjusted retention time of compound “X”. The retention index (**RI**) of compound “X” represents one hundred times the number of carbon atoms in the molecule of a hypothetical hydrocarbon that has the same retention as compound “X” (Babushok, 2015).
